# Supplementary material
Source: Springer Nature journal article supplement (https://www.springermedizin.de/resource/supplementary/12884_2014_1291_MOESM2_ESM.pdf/9458672)
Supplement: MOESM2 [file 9458672]

# ENROLLMENT AND RANDOMIZATION (n = 1440/site)

## ARM 1

**STAGE 1:**  
n = 480/site

**Begin Nutrition Intervention**  
Monitor Pregnancy Status

**STAGE 2 CONCEPTION**  
n = 240/site

**1st Trimester**  
Continue nutrition intervention

**2nd and 3rd Trimester**  
Continue nutrition intervention

**BIRTH**  
Stop nutrition intervention  
n = 192/site

**INFANT FOLLOW-UP**  
6 mo

## ARM 2

**STAGE 1:**  
n = 480/site

**Monitor Pregnancy Status**

**STAGE 2 CONCEPTION**  
n = 240/site

**1st Trimester**

**Start Nutrition Intervention**  
(12-14 wk)

**2nd and 3rd Trimester**  
Continue nutrition intervention

**BIRTH**  
Stop nutrition intervention  
n = 192/site

**INFANT FOLLOW-UP**  
6 mo

## ARM 3

**STAGE 1:**  
n = 480/site

**Monitor Pregnancy Status**

**STAGE 2 CONCEPTION**  
n = 240/site

**1st–3rd Trimesters**

**BIRTH**  
n = 192/site

**INFANT FOLLOW-UP**  
6 mo
